RESEARCH LETTER – Environmental Microbiology

# Solid and liquid media for isolating and cultivating acidophilic and acid-tolerant sulfate-reducing bacteria

Ivan Ćancucho<sup>†</sup>, Owen F. Rowe<sup>‡</sup>, Sabrina Hedrich<sup>§</sup>  
and D. Barrie Johnson<sup>\*</sup>

School of Biological Sciences, College of Natural Sciences, Bangor University, Bangor LL57 2UW, UK

<sup>\*</sup>Corresponding author: School of Biological Sciences, College of Natural Sciences, Bangor University, Bangor LL57 2UW, UK. Tel: +44-1248-382358; Fax: +44-1248-370731; E-mail: [d.b.johnson@bangor.ac.uk](mailto:d.b.johnson@bangor.ac.uk)

<sup>†</sup>Present address: Facultad de Ingeniería y Tecnología, Universidad San Sebastián, Lientur 1457 Concepción, Chile.

<sup>‡</sup>Present address: Department of Food and Environmental Sciences, Division of Microbiology and Biotechnology, Viikki Biocenter 1, University of Helsinki, Helsinki, Finland and the Department of Ecology and Environmental Science, Umeå University, SE-901 87 Umeå, Sweden.

<sup>§</sup>Present address: Federal Institute for Geosciences and Natural Resources, Resource Geochemistry, Stilleweg 2, 30655 Hannover, Germany.

**One sentence summary:** The paper describes how bacteria that live in acidic environments, and that form hydrogen sulphide from sulfate, may be isolated and grown in the laboratory.

**Editor:** Rich Boden

## ABSTRACT

Growth media have been developed to facilitate the enrichment and isolation of acidophilic and acid-tolerant sulfate-reducing bacteria (aSRB) from environmental and industrial samples, and to allow their cultivation *in vitro*. The main features of the 'standard' solid and liquid devised media are as follows: (i) use of glycerol rather than an aliphatic acid as electron donor; (ii) inclusion of stoichiometric concentrations of zinc ions to both buffer pH and to convert potentially harmful hydrogen sulphide produced by the aSRB to insoluble zinc sulphide; (iii) inclusion of *Acidocella aromatica* (an heterotrophic acidophile that does not metabolize glycerol or yeast extract) in the gel underlayer of double layered (overlay) solid media, to remove acetic acid produced by aSRB that incompletely oxidize glycerol and also aliphatic acids (mostly pyruvic) released by acid hydrolysis of the gelling agent used (agarose). Colonies of aSRB are readily distinguished from those of other anaerobes due to their deposition and accumulation of metal sulphide precipitates. Data presented illustrate the effectiveness of the overlay solid media described for isolating aSRB from acidic anaerobic sediments and low pH sulfidogenic bioreactors.

**Keywords:** acidophile; glycerol; media; sulfate-reducing bacteria; hydrogen sulphide; zinc

## INTRODUCTION

Sulfate-reducing bacteria (SRB) comprise a large number of phylogenetically diverse prokaryotes that have in common their ability to grow by catalysing the dissimilatory reduction of

sulfate to sulphide in anoxic environments (Muyzer and Stams 2008). They have been detected in, and isolated from, many different marine and freshwater environments, and soils, and also from many 'extreme' environments. Thermophilic,

psychrophilic, halophilic and alkalophilic species have been described. Acidic environments have presented something of a conundrum, however, as although there have been numerous reports of sulfidogenic activity in anoxic sediments in, for example, sulfate-rich streams draining mine sites, attempts to isolate acidophilic or acid-tolerant strains of SRB (aSRB) have, until relatively recently, mostly been unsuccessful (Dopson and Johnson 2012).

One of the hazards faced by SRB is that the sulphide they produce (particularly H<sub>2</sub>S, which is the dominant form present at pH < 7) is toxic to them, as to other life forms, at relatively low (millimolar) concentrations (Koschorreck 2008). In many situations (e.g. enrichment culture formulations for neutrophilic SRB), ferrous iron acts as a sink for sulphide, removing it as insoluble, non-bioavailable, iron sulphide (FeS). However, the solubility product of FeS is such that it does not precipitate at pH < 5, and therefore cannot act as an effective sink for sulphide in moderately to extremely acidic situations (Lewis 2010). A second generic problem for acidophiles is the toxicity of small molecular weight organic acids (Norris and Ingledew 1992). Many SRB are 'incomplete substrate oxidizers', in that they partially oxidize organic substrates and release the end product(s) of their metabolism (frequently acetate) into their growth milieu. At pH values below their respective pK<sub>a</sub> values (4.75 for acetic acid), small molecular weight organic acids occur predominantly as non-dissociated, lipophilic molecules. Acetic acid is toxic to many chemolithotrophic bacteria when present in micromolar concentrations, though some heterotrophic acidophiles (e.g. *Acidocella* (*Ac.*) *aromatica*) are more tolerant of this and some other aliphatic acids, and use it as a carbon and energy source (Jones, Hedrich and Johnson 2013). Many media formulations used to enrich neutrophilic SRB utilize organic acids, such as lactate, as carbon and energy sources (e.g. Postgate 1963). As with acetic acid, lactate exists predominantly as non-dissociated lactic acid at low pH, and again micromolar concentrations of this potential electron donor are sufficient to partially or completely inhibit the growth of SRB (and most other bacteria) in acidic media. In contrast, organic substrates, such as glycerol, that are uncharged at low pH have been used successfully to enrich for acid-tolerant strains (e.g. Sen and Johnson 1999).

A variety of solid media formulations have been developed to facilitate the isolation and enumeration of acidophilic chemolithotrophic and heterotrophic microorganisms from environmental and industrial samples (Johnson and Hallberg 2007). Most of these media employ an 'overlay' technique, in which a double-layered gel is used in a standard Petri plate, the lower layer of which is inoculated with an active culture of a heterotrophic acidophile (usually an *Acidiphilium* sp.) while the upper layer is not. The rationale is that the heterotrophic acidophile metabolizes the small molecular weight compounds (such as pyruvic acid) that derive from acid hydrolysis of commonly used gelling agents such as agar. Using this technique, it has been possible to routinely isolate and cultivate chemolithotrophic bacteria (such as *Leptospirillum* spp.) that had previously been considered not to grow on solid media (Johnson 1995).

Here we describe solid and liquid media that have been developed in the authors' laboratory and used successfully over a number of years to isolate and enumerate aSRB from environmental samples, and also to cultivate isolates as axenic cultures in the laboratory.

## MATERIALS AND METHODS

### Solid media

The standard solid medium developed to isolate aSRB from environmental samples and laboratory enrichment cultures was a variant of overlay media previously described for aerobic acidophiles (Johnson and Hallberg 2007). The main differences were (i) higher pH of the 'standard' aSRB medium (~3.7 compared to ~2.7 for the aerobic medium plates); (ii) using the type strain of *Ac. aromatica* rather than *Acidiphilium cryptum* strain SJH in the underlay gel; (iii) inclusion of 4 mM glycerol (as electron donor) and 7 mM zinc (as the sink for hydrogen sulphide). Two solutions were prepared and sterilized separately by autoclaving (121°C, 20 min) and a third solution (acidic ferrous sulfate) sterilized by filtration through 0.2 µm (pore size) membranes:

**Solution A**—20 mL of concentrated basal salts solution, containing (g/L) MgSO<sub>4</sub>·7H<sub>2</sub>O (25), (NH<sub>4</sub>)<sub>2</sub>SO<sub>4</sub> (22.5), Na<sub>2</sub>SO<sub>4</sub>·10H<sub>2</sub>O (7.5), KH<sub>2</sub>PO<sub>4</sub> (2.5), KCl (2.5) and Ca(NO<sub>3</sub>)<sub>2</sub>·4H<sub>2</sub>O (0.7), mixed with 770 mL of reverse osmosis (RO)-grade water, 4 mL of 1 M glycerol, 0.1 g of yeast extract, 7 mL of 1 M zinc sulfate and 0.875 g of magnesium sulfate. One millilitre of a concentrated trace elements solution was added, the mixture adjusted to pH 3.5 with sulfuric acid and autoclaved. The trace elements solution contained (g/L): ZnSO<sub>4</sub>·7H<sub>2</sub>O (10), CuSO<sub>4</sub>·5H<sub>2</sub>O (1.0), MnSO<sub>4</sub>·4H<sub>2</sub>O (1.0), CoSO<sub>4</sub>·7H<sub>2</sub>O (1.0), Cr<sub>2</sub>(SO<sub>4</sub>)<sub>3</sub>·15H<sub>2</sub>O (0.5), H<sub>3</sub>BO<sub>3</sub> (0.6), Na<sub>2</sub>MoO<sub>4</sub>·2H<sub>2</sub>O (0.5), NiSO<sub>4</sub>·6H<sub>2</sub>O (1), Na<sub>2</sub>SeO<sub>4</sub>·10H<sub>2</sub>O (1), Na<sub>2</sub>WO<sub>4</sub>·2H<sub>2</sub>O (0.1) and NaVO<sub>3</sub> (0.1).

**Solution B**—5 g of agarose (Sigma Type I) suspended in 200 mL of RO water.

Solutions A and B were combined when they had cooled to about 50°C, and 0.1 mL of 1 M ferrous sulfate (Solution C) added. The combined solutions were mixed and split into two portions of approximately similar volumes. Ten millilitres of a culture of *Ac. aromatica*<sup>T</sup> (pre-grown in an acidic (pH 3) medium containing 5 mM fructose, basal salts and trace elements, as above) was added to one portion, and ca. 20 mL aliquots of the inoculated molten gel poured into sterile Petri plates. When this layer had solidified, the other (sterile) combined solution, which had been retained in a molten state by storing in a 50°C water bath, was poured on top, again in aliquots of ca. 20 mL/plate (Fig. 1).

Variants on this 'standard' (glycerol/zinc) aSRB solid medium formulation were (i) a non-overlay version; (ii) one in which zinc sulfate was replaced with 7 mM (final concentration) ferrous sulfate; (iii) more acidic variants (final pH values of ~2.8 or 2.3, achieved by adjusting the pH of solution A to either 2.5 or 2.0, respectively) in which zinc sulfate was replaced with copper sulfate (CuS has a smaller solubility product than ZnS and precipitates at pH 2.8 whereas ZnS does not). Because of the greater sensitivity of *Ac. aromatica* to copper than to zinc (Jones, Hedrich and Johnson 2013), the concentration of copper sulfate added was 0.25 mM; (iv) a circumneutral pH non-overlay variant (adjusting the pH of solution A to 7.0). The pH values of the gelled media were measured using a calibrated flat-tipped combined pH electrode (Hanna instruments, UK) coupled to an Accumet 50 pH/E<sub>H</sub> meter.

### Liquid media

The standard liquid medium used to grow aSRB isolates *in vitro* contained basal salts/trace elements/magnesium sulfate (as above) supplemented with 4 mM (final concentration) glycerol,

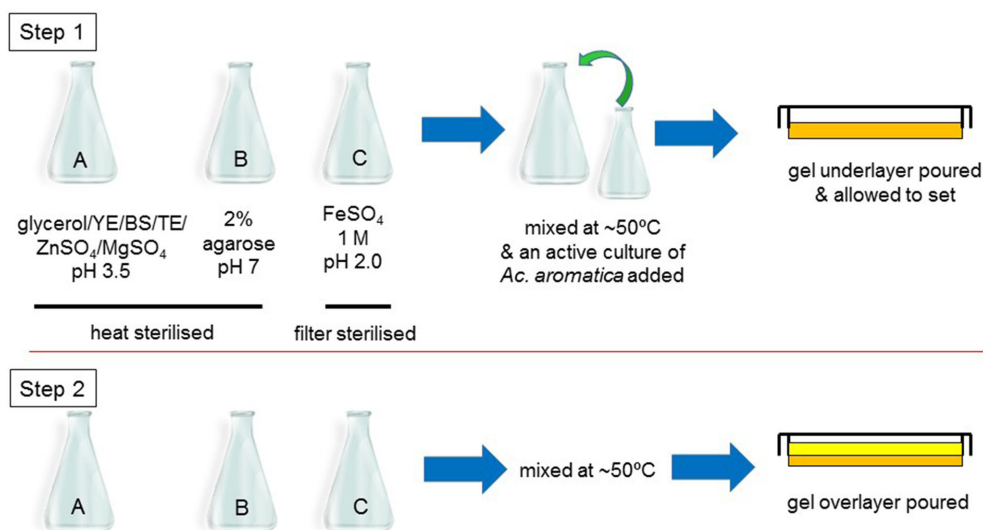

Figure 1. Schematic representation of the approach used to prepare overlay medium for aSRB.

0.01% (w/v) yeast extract and 7 mM zinc sulfate. The pH of the medium was adjusted to either 3.5 or 4.0 with 1 M sulfuric acid, de-aerated under vacuum and autoclaved at 121°C for 20 min. Ferrous sulfate was added to the cooled medium to give a final concentration of 100  $\mu$ M (resulting in slight reductions in media pH, to ~3.4 and 3.7, respectively). The liquid medium was stored at ambient temperature in an anaerobic glove-box (Plas Labs, Lansing, MI) under a nitrogen/carbon dioxide atmosphere prior to use. A second liquid medium in which zinc sulfate was replaced with 7 mM ferrous sulfate (and pH adjusted between 3.0 and 5.0) was also used in some experiments.

### Isolation of aSRB on solid media

#### Environmental samples

Sediments in an acidic stream draining an abandoned copper mine (Cantareras, located in the Iberian Pyrite Belt in south-west Spain; Rowe et al. 2007) were sampled at the entrance, and 10, 30 and 60 m downstream of the mine adit. Sediment samples were placed in sterile Falcon tubes, which were filled to capacity and sealed at the mine site. In the laboratory, 0.5 g of each sediment was mixed with 0.5 mL of pH 2.5 basal salts solution and the suspensions serially diluted and spread onto overlay aSRB solid media. Inoculated plates were incubated under anaerobic conditions at 30°C using the AnaeroGen system (Oxoid, UK), for up to 1 month. Colonies that grew on SRB plates were examined under a binocular microscope, and sulfidogens tentatively identified by their deposition of metal sulphides (ZnS or CuS) which gave distinctive coloration and metallic sheens to the colonies (Fig. 2). The identities of putative aSRB isolates were confirmed by amplifying and sequencing their 16S rRNA genes (Rowe et al. 2007). Other overlay plates formulated to support the growth of chemolithotrophic and heterotrophic acidophiles (Johnson and Hallberg 2007) were inoculated at the same time and incubated at 30°C under aerobic conditions.

#### Laboratory bioreactor cultures

Liquid samples from two continuous-flow sulfidogenic bioreactors, maintained at pH between 2.8 and 4.5 and used to selectively precipitate transition metals from synthetic mine waters (Nancuqueo and Johnson 2012b), were serially diluted and

spread onto glycerol/zinc overlay aSRB medium. Terminal restriction enzyme fragment length polymorphism (T-RFLP) analysis was carried out in parallel to obtain an overview of the compositions of the bacterial communities in the bioreactors (Nancuqueo and Johnson 2012b). The bioreactors had originally been inoculated with pure cultures of two aSRB: *Desulfosporosinus acididurans*<sup>T</sup> (Sánchez-Andrea et al. 2015) and '*Desulfobacillus acidavidus*' strain CL4 (Nancuqueo and Johnson 2012b), and also with dissected samples of a sulfidogenic microbial mat taken from a stream draining the Cantareras mine.

#### Pure cultures of aSRB

Acidophilic and acid-tolerant SRB that had been isolated previously were also tested for growth on the various solid media. These were *D. acididurans*<sup>T</sup> (originally isolated from a geothermal site in Monserrat, West Indies), and '*Db. acidavidus*' strain CL4 and *Firmicutes* strain C5, both of which had been isolated from the microbial mat at Cantareras.

## RESULTS AND DISCUSSION

The solid and liquid media described have been used routinely to isolate and cultivate aSRB in the authors' laboratory for several years. *Ac. aromatica* is used in the underlayer gel, as, unlike *Acidiphilium* spp. and other *Acidocella* spp., this heterotrophic acidophile uses only a limited range of organic donors (including fructose and acetic acid) but does not grow on yeast extract, glucose, glycerol or many other small molecular weight organic compounds that are commonly metabolized by acidophilic heterotrophic microorganisms. The aSRB present in plate inocula and *Ac. aromatica* do not compete, therefore, for the glycerol and yeast extract included in the aSRB overlay media. However, acetic acid, which is produced as a metabolic waste product by some strains of aSRB, is metabolized by the non-sulfidogenic heterotrophic acidophile, thereby circumventing the problem of this (and other) aliphatic acids inhibiting the growth of the sulfate reducers. Both the standard solid and liquid media contain zinc sulfate, which has two important functions: (i) removal of toxic hydrogen sulphide as ZnS and (ii) buffering pH. In acidic media, sulfidogenesis is a

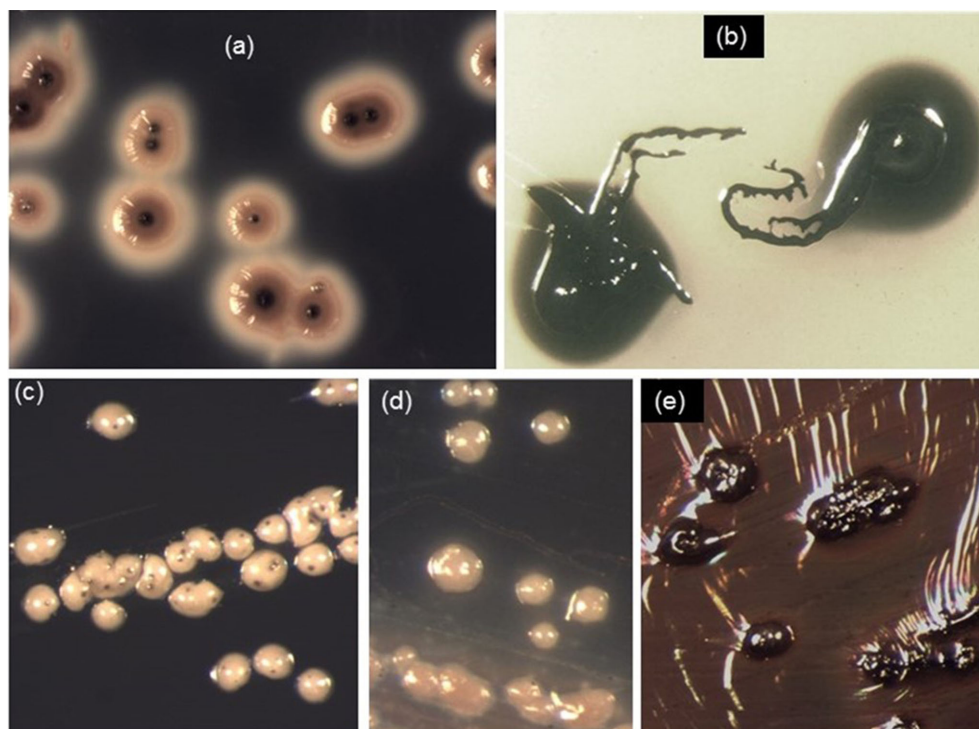

**Figure 2.** Colonies of aSRB grown on solid media: (a) *D. acididurans*, grown on glycerol/zinc overlay medium; (b) *D. acididurans* grown on glycerol/ferrous iron non-overlay medium; (c) '*Desulfobacillus acididurans*' strain CL4, grown on glycerol/zinc overlay medium; (d) *Peptococcaceae* strain CEB3, grown on glycerol/zinc overlay medium; (e) *Firmicute* strain C5 grown on glycerol/zinc overlay medium for 6 weeks, showing colonies covered with shell-like coating of ZnS.

proton-consuming reaction, as (a) the end products of organic substrate (e.g. glycerol) oxidation are either carbon dioxide (complete oxidizers; equation 1) or a mixture of carbon dioxide and acetic acid (incomplete oxidizers; equation 2), and (b) sulfate is reduced to  $\text{H}_2\text{S}$  rather than to  $\text{HS}^-$ :

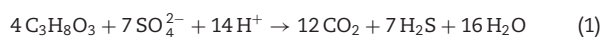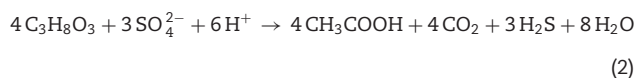

However, the reaction between soluble zinc ions and hydrogen sulphide generates protons (equation 3), which causes the net reaction in the presence of zinc (shown for the complete oxidation of glycerol in equation 4) to be pH neutral:

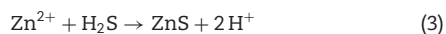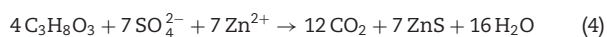

For this to be effective, soluble zinc has to be present in greater or equimolar concentrations to the amount of hydrogen sulphide produced. The 'standard' solid and liquid media devised for isolating aSRB contain a molar ratio of glycerol and zinc of 4:7, which provides sufficient zinc to react with the theoretical maximum amount of  $\text{H}_2\text{S}$  generated (i.e. for aSRB that oxidize glycerol completely to  $\text{CO}_2$ ) and an excess in the case of incomplete oxidizers. All strains of aSRB isolated in the authors' laboratory have been found to tolerate zinc concentrations well above 7 mM, so that the issue of potential zinc toxicity does not arise. However, lower concentrations of zinc can also be used (if toxicity is suspected) in both solid and liquid media, so long as

the 4:7 ratio (assuming that glycerol is used as electron donor) is maintained. Measurement of the pH of solid and liquid glycerol/zinc media confirmed that pH changes were minor (increasing from  $\sim 3.7$  to  $\sim 4.0$ ) in grown cultures, in contrast to those containing ferrous sulfate where the pH increased to  $\sim 7$ . The presence of zinc in both solid and liquid media also served as a useful indicator of growth of aSRB. Formation of ZnS in liquid cultures is evidenced by the formation of silver/pink-coloured metallic precipitates (which tend to coat the walls of growth vessels), while ZnS-stained colonies of aSRB are also readily differentiated from non-sulfidogenic anaerobes. Continued accumulation of ZnS causes aSRB colonies to develop hard surface coats with protracted incubation (Fig. 2e).

### Isolation of aSRB from environmental samples

Figure 3 shows data of direct isolation of bacteria from stream sediments taken from the abandoned Cantareras copper mine using a variety of overlay solid media. Isolates were categorized as follows: (i) iron-oxidizing aerobes (ferric iron-encrusted colonies on aerobically incubated ferrous iron overlay plates); (ii) heterotrophic aerobes (colonies that grew on aerobically incubated yeast extract overlay plates); (iii) aSRB (colonies encrusted with ZnS or CuS on anaerobically incubated overlay plates); (iv) other anaerobes (colonies on anaerobically incubated overlay plates that were not encrusted with ZnS or CuS). Confirmation of sulphide production by putative SRB isolates was confirmed when colonies were transferred into liquid media, and isolates identified from sequence analysis of their 16S rRNA genes.

Numbers of cultivatable acidophiles were relatively low in the sediment sample from the mine adit entrance ( $<10^3/\text{g}$ ) but

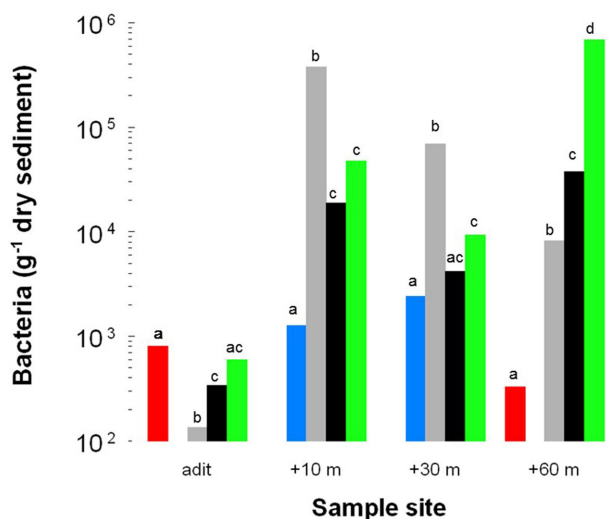

**Figure 3.** Relative numbers of acidophilic bacteria isolated on solid media from sediment samples taken from the abandoned Cantareras copper mine at, and downstream from, the mine adit entrance. Key: red bars, iron-oxidizing aerobes; blue bars, aerobic heterotrophs; grey bars, aSRB (isolated on glycerol/zinc plates); black bars, aSRB (isolated on glycerol copper plates, pH ~ 2.8); green bars, non-sulfidogenic anaerobes. No colonies were obtained on more acidic (pH ~ 2.3) glycerol/copper plates, or on circumneutral pH solid media. In cases where bars are absent, numbers of bacteria isolated were less than  $10^2$  g<sup>-1</sup>. For each sample site, bars not annotated with the same letter are significantly different (95% confidence limit).

were generally far greater (in some cases by two to three orders of magnitude) downstream of the adit. This was particularly noticeable with the anaerobic acidophiles (both the aSRB and the non-sulfidogenic isolates) in samples underlying streamer/mat growths that proliferated in the drainage channel at those sampling points (Rowe et al. 2007). The surfaces of these stratified macroscopic growths were dominated by acidophilic algae which were thought to provide much of the organic carbon that sustained the underlying streamer/mat microbial communities, which were predominantly heterotrophic (Nancuqueo and John-

son 2012a). The identities of the non-sulfidogenic anaerobic acidophiles were not determined.

Colony-forming units of putative aSRB were about an order of magnitude fewer on glycerol/copper plates (pH 2.8) than on the higher pH zinc-containing plates (sediments taken at 10 and 30 m downstream of the adit entrance) but were present in slightly greater numbers in the other two sediment samples (Fig. 3). No colonies grew on the more acidic (pH 2.3) glycerol/copper plates nor on the circumneutral pH solid medium. Colonies of aSRB on copper-containing plates (stained black due to the deposition of CuS) were much smaller than those on zinc-containing plates and displayed superior growth when transferred to the latter. This was considered due, at least in part, to the greater amount of electron donor (glycerol) in the 'standard' solid medium, but could also reflect a preference of the isolates for growing at slightly higher pH.

### Isolation of aSRB from laboratory bioreactor samples

Bacteria (both aSRB and non-sulfidogens) were isolated on solid media at regular intervals from acidic sulfidogenic bioreactors used to selectively remove transition metals from synthetic acidic mine drainage waters and operated at different pH values (Nancuqueo and Johnson 2012b; Hedrich and Johnson 2014). Figure 4 shows T-RFLP profiles of the bacterial populations when one of the bioreactors was operated at pH 4.5, 3.0 and 2.8. The profiles were dominated by four restriction fragments of different lengths, each corresponding to a single bacterial species. Two of these were acidophilic sulfidogens (*D. acididurans* and *Peptococcaceae* strain CEB3; Petzsch et al. 2015) while the other two (*Acidithiobacillus ferrooxidans* and *Alicyclobacillaceae* strain IR2) were facultative anaerobes that did not reduce sulfate. The two sulfidogens and strain IR2 were all isolated from bioreactor liquors on glycerol/zinc plates incubated under anaerobic conditions, while *At. ferrooxidans* was isolated on ferrous iron-containing overlay plates incubated aerobically (Johnson and Hallberg 2007). Plate counts reflected the relative abundance of bacteria indicated by semi-quantitative T-RFLP analysis.

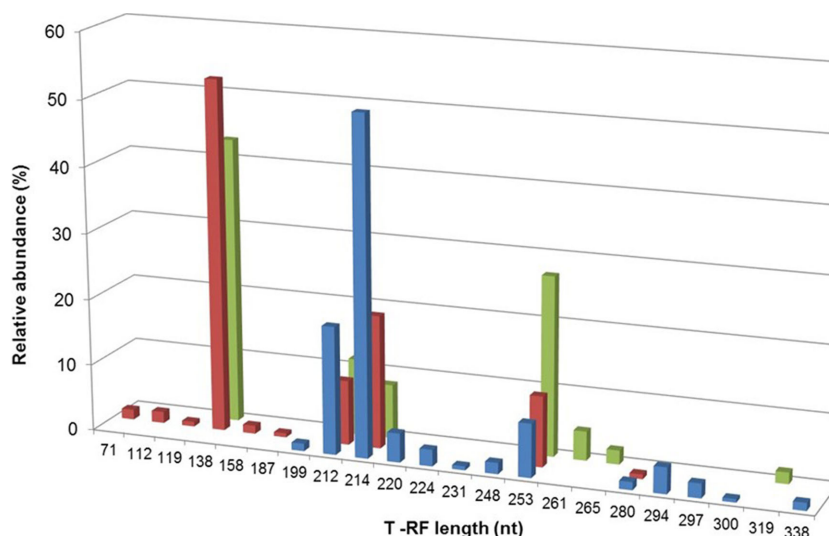

**Figure 4.** T-RFLP profiles of bacterial 16S rRNA genes (digested with HaeIII) of planktonic bacteria in an acidic sulfidogenic bioreactor, operated at pH 4.5 (blue bars), pH 3.0 (red bars) and pH 2.8 (green bars). The main T-RFs corresponded to 138 nt, *Peptococcaceae* strain CEB3; 212 nt, *Alicyclobacillaceae* strain IR2; 214 nt, *D. acididurans*; 253 nt, *At. ferrooxidans*.

## Growth of pure cultures of aSRB on solid media

Some strains of aSRB isolated and maintained in the authors' laboratory (e.g. strains CL4 and C5) grew on both overlay and non-overlay glycerol/zinc solid media, though colonies tended to grow more slowly and were smaller on the latter. In contrast, *D. acididurans* only grew on the overlay variant of the standard medium, though it also grew on non-overlay plates in which ferrous iron substituted for zinc sulfate. In the latter case, the colonies of *D. acididurans* were heavily stained black (encrusted with FeS) rather than encrusted with silver/pink-coloured ZnS (Fig. 2a and b) and the pH of the solid medium increased to ~7 rather than being buffered at ~pH 4. These differences in behaviour can be attributed to the fact that strains CL4 and C5 appear to oxidize glycerol completely to CO<sub>2</sub>, whereas *D. acididurans* is an incomplete oxidizer. In the pH-buffered glycerol/zinc plates, the acetic acid produced by *D. acididurans* inhibits the growth of the sulfidogen, unless (as in the overlay plate variant) it is removed by *Ac. aromatica* (Kimura, Hallberg and Johnson 2006). However, in the absence of zinc, the pH of the medium increased (as evidenced by the formation of FeS) causing acetic acid to dissociate to the relatively non-toxic acetate anion, thereby allowing this sulfidogen to grow. Overlay plates are considered to be more versatile and efficient, particularly for isolating acidophilic sulfidogens from environmental samples, given that these may contain both complete and incomplete substrate-oxidizing aSRB.

While the solid and liquid media described herein have proven effective for isolating and cultivating aSRB, other formulations have also been used with varying success. Many sulfidogens (including *D. acididurans*), for example, can use hydrogen as electron donor, and in this case the potential problem of toxicity caused by incomplete oxidation of an organic electron donor obviously does not arise. There are several pragmatic issues, however, which can limit the use of this inorganic electron donor, including the fact that, unlike with glycerol, it is extremely difficult or impossible to control the molar ratio of this electron donor to the H<sub>2</sub>S sink (zinc ions) which severely limits the potential for pH buffering in batch liquid cultures and solid media. Experiments carried out in which glycerol/zinc plates incubated in anaerobic jars with or without hydrogen gas have not resulted in any significant increases in numbers of aSRB colonies obtained from environmental samples, suggesting that many, if not most hydrogen-oxidizing aSRB, can also grow on glycerol.

## ACKNOWLEDGEMENTS

The authors wish to acknowledge the contributions of many past and current members of the *Bangor Acidophile Research Team* in general, and Dr Barry M. Grail in particular, for their contributions to the work described in this report.

**Conflict of interest.** None declared.

## REFERENCES

- Dopson M, Johnson DB. Biodiversity, metabolism and applications of acidophilic sulfur-metabolizing micro-organisms. *Environ Microbiol* 2012;**14**:2620–31.
- Hedrich S, Johnson DB. Remediation and selective recovery of metals from acidic mine waters using novel modular bioreactors. *Environ Sci Technol* 2014;**48**:12206–12.
- Johnson DB. Selective solid media for isolating and enumerating acidophilic bacteria. *J Microbiol Meth* 1995;**23**:205–18.
- Johnson DB, Hallberg KB. Techniques for detecting and identifying acidophilic mineral-oxidizing microorganisms. In: Rawlings DE, Johnson DB (eds). *Biomining*. Heidelberg: Springer, 2007, 237–62.
- Jones RM, Hedrich S, Johnson DB. *Acidocella aromatica* sp. nov.: an acidophilic heterotrophic alphaproteobacterium with unusual phenotypic traits. *Extremophiles* 2013;**17**:841–50.
- Kimura S, Hallberg KB, Johnson DB. Sulfidogenesis in low pH (3.8–4.2) media by a mixed population of acidophilic bacteria. *Biodegradation* 2006;**17**:57–65.
- Koschorreck M. Microbial sulphate reduction at a low pH. *FEMS Microbiol Ecol* 2008;**64**:329–42.
- Lewis AE. Review of metal sulfide precipitation. *Hydrometallurgy* 2010;**104**:222–34.
- Muyzer G, Stams AJM. The ecology and biotechnology of sulfate-reducing bacteria. *Nat Rev Microbiol* 2008;**6**:441–53.
- Ñancucheo I, Johnson DB. Acidophilic algae isolated from mine-impacted environments and their roles in sustaining heterotrophic acidophiles. *Front Microbiol* 2012a;**3**:235.
- Ñancucheo I, Johnson DB. Selective removal of transition metals from acidic mine waters by novel consortia of acidophilic sulfidogenic bacteria. *Microb Biotechnol* 2012b;**5**:34–44.
- Norris PR, Ingledew WJ. Acidophilic bacteria: adaptations and applications. In: Herbert RA, Sharp AJ (eds). *Molecular Biology and Biotechnology of Extremophiles*. Glasgow: Blackie, 1992, 115–42.
- Petzsch P, Poehlein A, Johnson DB et al. Genome of the acidophilic sulfate reducing Peptococcaceae bacterium strain CEB3. *Genome Announc* 2015;**3**:e00886-15, DOI: 10.1128/genomeA.00886-15.
- Postgate JR. Versatile medium for the enumeration of sulfate-reducing bacteria. *Appl Microbiol* 1963;**11**:265–7.
- Rowe OF, Sánchez-España J, Hallberg KB et al. Microbial communities and geochemical dynamics in an extremely acidic, metal-rich stream at an abandoned sulfide mine (Huelva, Spain) underpinned by two functional primary production systems. *Environ Microbiol* 2007;**9**:1761–71.
- Sánchez-Andrea I, Stams AJM, Hedrich S et al. *Desulfosporosinus acididurans* sp. nov., an acidophilic sulfate-reducing bacterium isolated from acidic sediments. *Extremophiles* 2015;**19**:39–47.
- Sen AM, Johnson DB. Acidophilic sulphate-reducing bacteria: candidates for bioremediation of acid mine drainage. In: Amils R, Ballester A (eds). *Biohydrometallurgy and the Environment Toward the Mining of the 21st Century*. Process Metallurgy 9A. Amsterdam: Elsevier, 1999, 709–18.
